# Supplementary material
Source: Springer Nature journal article supplement (https://www.springermedizin.de/resource/supplementary/13058_2010_2859_MOESM7_ESM.pdf/9702726)

**A****IRF Protein Expression**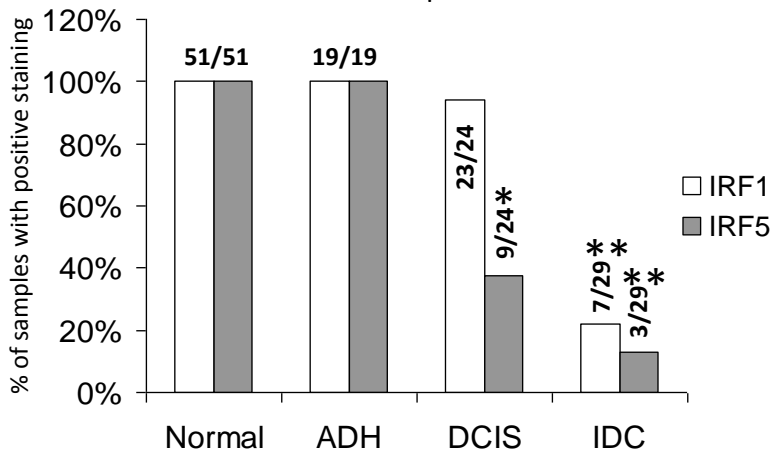**B****IRF Expression in DCIS**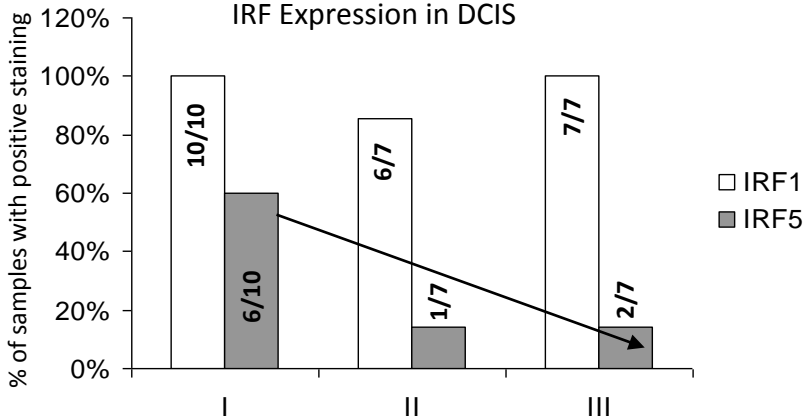

Supplement: MOESM7 [file 9702726]
